# Supplementary material for: Chemical and isotopic composition of secondary organic aerosol generated by α -pinene ozonolysis
Source: Copernicus journal article supplement (doi:10.5194/acp-2016-98), 2016-02-19
Supplement: Supplementary file 1 [file acp-2016-98-supplement.zip]

# Supplementary Information for: Chemical and isotopic composition of secondary organic aerosol generated by $\alpha$ -pinene ozonolysis

Carl Meusinger<sup>1</sup>, Ulrike Dusek<sup>2,3</sup>, Stephanie M. King<sup>1,4</sup>, Rupert Holzinger<sup>2</sup>, Thomas Rosenørn<sup>1,5</sup>, Peter Sperlich<sup>6,7</sup>, Maxime Julien<sup>8</sup>, Gerald S. Remaud<sup>8</sup>, Merete Bilde<sup>1,9</sup>, Thomas Röckmann<sup>2</sup>, and Matthew S. Johnson<sup>1</sup>

<sup>1</sup>Department of Chemistry, University of Copenhagen, DK 2100, Copenhagen Ø, Denmark

<sup>2</sup>Institute for Marine and Atmospheric research Utrecht (IMAU), Utrecht University, 3584 CC, Utrecht, The Netherlands

<sup>3</sup>Centre for Isotope Research, Energy and Sustainability Research Institute Groningen, 9747 AG Groningen, The Netherlands

<sup>4</sup>now at: Haldor Topsøe A/S, DK 2800, Kgs. Lyngby, Denmark

<sup>5</sup>Infuser ApS, DK 2200, Copenhagen N, Denmark

<sup>6</sup>Max-Planck Institute for Biogeochemistry, 07745 Jena, Germany

<sup>7</sup>now at: National Institute of Water and Atmospheric Research (NIWA), Wellington 6021, New Zealand

<sup>8</sup>CEISAM, UMR CNRS6230, BP 92208, Nantes 44322 cedex 3, France

<sup>9</sup>now at: Aarhus University, Department of Chemistry, 8000 Aarhus C, Denmark

*Correspondence to:* C.M. (c.meusinger@gmail.com)

## S1 Chamber aerosol characterisation

Figure S1 shows the temporal evolution of SMPS-derived size-distributions and an estimate for total mass concentration,  $M_{\text{total}}^{\text{SMPS}}$ , derived by assuming spherical particles with a density of 1.2 g/cm<sup>3</sup> (Zelenyuk et al., 2008). The charge-correction was not applied to these number-size distributions because the distribution tail at large diameters was beyond the SMPS cut-off diameter. This caused artefacts when applying the charge correction. After the start of VOC-injection, an initial population of particles is formed that grows continuously to sizes of several hundred nanometers within the first hours of the experiment. Multiple populations become visible in Fig. S1 after ca. 5 h that are likely artefacts of multiply-charged particles. As the initial population is growing, it leaves the 'field of view' of the SMPS. As the large particles of the first generation are flushed out of the chamber, less surface area is available for condensation of oxidised vapours and new particle formation is again favoured (at ca. 7 h after start of VOC injection). Roughly one day after injection, new particle formation, condensation upon existing particles, wall losses and the flux of species in and out of the bag are in equilibrium and the measured size distributions stay nearly constant for several days.

Fluctuations in the total mass of the aerosol population (e.g. around 50 h after injection) are most likely due to variations in the VOC injection system. Temporal variability in the size-distribution data originates partly from the fact that no seed particles were present, but such temporal changes in the size-distribution average out over long sampling periods. Panel a in Fig. S2 shows that the SMPS-derived aerosol size distributions is relatively constant over the full sampling time of filters 5 and 6. The two different OH scavengers (experiments A and B) show very similar mass concentrations and the size distributions share the same shape (not shown).

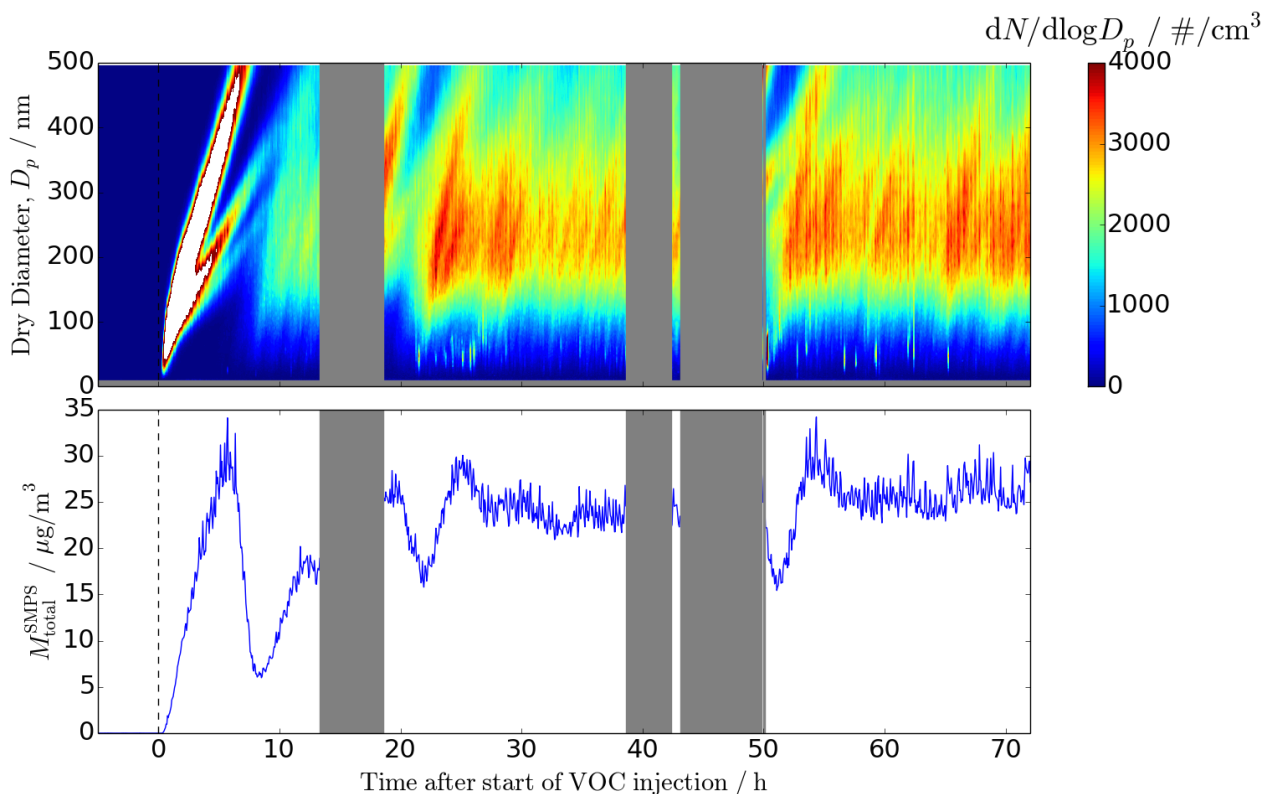

**Figure S1.** SMPS number size-distribution (10-500 nm range) in  $\#/\text{cm}^3$  and total mass concentration,  $M_{\text{total}}^{\text{SMPS}}$ , plotted versus time (for experiment B). Time zero corresponds to the start of VOC injection into the chamber. Filters 5 and 6 sampled between ca. 18 and 42 h and filters 7 and 8 between ca. 48 and 72 h. The SMPS cut-off diameter of 500 nm excludes larger particles, making  $M_{\text{total}}^{\text{SMPS}}$  a lower limit. The grey areas denote times when the instrument was offline. The white patch in the initial particle bloom is off the colour scale with values up to  $4950/\text{cm}^3$ .

Panel b in Fig. S2 shows how the generated aerosol particles perform as cloud condensation nuclei. CCN measurements were performed as described previously (King et al., 2012). In short, the aerosol is simultaneously characterized by an SMPS and a CCNC system. The CCNC system itself consists of a DMA, that provides a mono disperse aerosol population for the CCNC and a CPC. The CCNC counts the activated number of particles while the CPC counts the total particle concentration. An automated program allows scanning over the DMA dry diameter and the supersaturation in the CCNC. At each supersaturation, a CCN activity curve is obtained that plots the activated fraction of the aerosol (the ratio of activated aerosol over total concentration) versus the dry diameter of the DMA. Using the size-distribution measured by the SMPS, an inversion is run in order to fit the activity curve (considering multiple charges) and to determine the critical dry diameter, i.e. the size at which particles will activate to be CCN at the given supersaturation. Finally, the program steps through a number of supersaturations in the CCNC

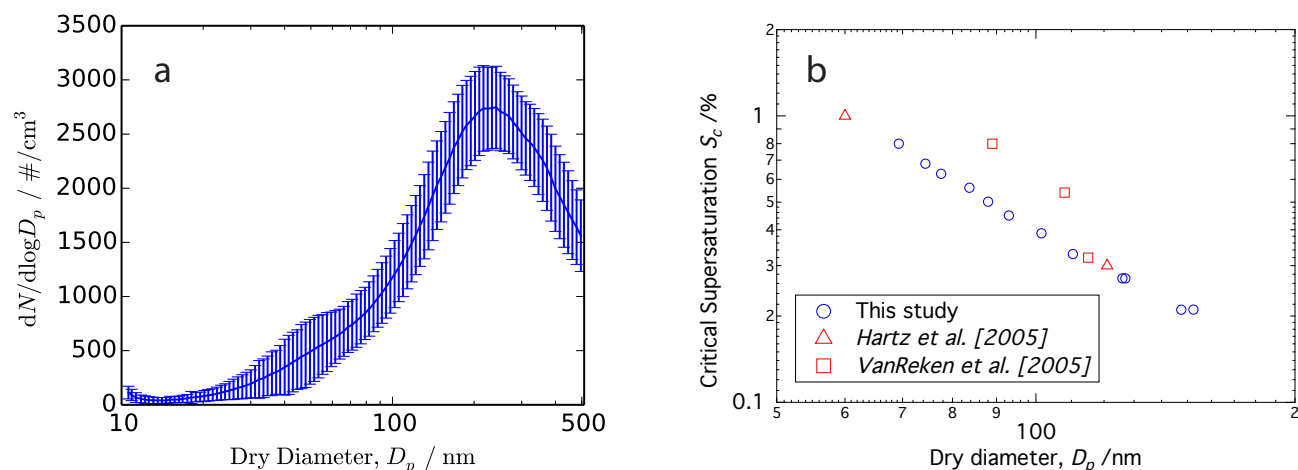

**Figure S2.** Characterisation of generated aerosol. Panel a shows the average size-distribution and 1- $\sigma$  standard deviation of the aerosol inside the chamber detected by SMPS during sampling of filters 5 and 6. Panel b shows the CCN activity measured for experiment A. The CCN activity of the generated SOA in the chamber is in agreement with literature data (Hartz et al., 2005; VanReken et al., 2005).

in order to derive a curve like the one presented in Panel b in Fig. S2, where for each supersaturation, the critical dry diameter is given.

## S2 Notes on PTR-MS data

### S2.1 Fragmentation in the PTR-MS

- 5 Fragmentation of compounds in the PTR-MS is a common artefact (e.g., Holzinger et al., 2010). When such fragmentation occurs, only charged fragments are detected. Protonated water is a common fragment but cannot be observed due to the large background of the primary  $\text{H}_3\text{O}^+$  ions (19.013 Da). The formation of undetected water means that some oxygen escapes detection, which lowers the reported O:C ratio. If the charged fragments do not coincide in mass with a primary ion at least one of the fragments will be detected by the PTR-MS.
- 10 The arrows in the mass spectrum in Fig. 3 indicate pairs of peaks with a mass difference of 14.016 Da (light arrow) and 18.011 Da (dark arrow). The former can be associated with a  $\text{CH}_2$  group while the latter corresponds to the mass of a water molecule. When multiple water molecules are lost this produces series of molecules that are connected this way. In one series ions can originate from the same parent compound entering the PTR-MS. In that case these ions show similar thermograms (similar relative concentrations at different temperature steps). This is the case for the ions the dark arrow connects - the
- 15 large peak at 169.085 Da and the smaller one at 187.097 Da. The ion concentrations differ by a factor of ca. 10, but their thermograms are similar, which indicates that the actual compound desorbing from the filter has a mass of 187.097 Da. The

peak at 169.085 Da becomes amplified because of the favoured loss of a water molecule. Ions that are part of a series of the H<sub>2</sub>O-loss fragmentation pattern can be numbered relative to each other as  $\pm n \times 18.011$  Da. Table 4 and Sect. S4 lists the number  $n$  for members of the same series.

- Besides the fragmentation that forms water, other fragmentation patterns can occur as well in the PTR-MS. Fragmentation
- 5 depends on the applied  $E/N$  value (Tani et al., 2003; Cappellin et al., 2012), where  $E$  is the electric field strength and  $N$  the buffer gas number density.  $E/N$  describes the drift tube conditions in the PTR-MS and is given in units of Td (1 Td = 1 Townsend =  $10^{-17}$  Vcm<sup>2</sup>mol<sup>-1</sup>). Under the employed conditions ( $E/N = 124.4$  Td) significant fragmentation is expected for instance for pure gaseous compounds (Tani et al., 2003).

## S2.2 Resolution and discrimination of peaks reported in the literature

- 10 The high mass resolution of the PRT-ToF-MS used in the present study allows more detailed interpretation of the results compared to previous low resolution data obtained with a quadrupole MS. In particular, the PTR-ToF-MS has not been used for measuring the particulate constituents of  $\alpha$ -pinene ozonolysis before whereas quadrupole PTR-MS instruments have been used for monitoring the gas-phase (Shilling et al., 2008; Lee et al., 2006) of SOA chamber experiments. These results are difficult to compare, since partitioning coefficients are not known for many organic compounds. The ion with the highest
- 15 concentration in this study at 169.085 Da will serve as an example: A low resolution peak at 169 Da might be associated with pinonaldehyde (C<sub>10</sub>H<sub>16</sub>O<sub>2</sub>H<sup>+</sup>), one of the main gas-phase oxidation products of the first reaction step in  $\alpha$ -pinene ozonolysis (Camredon et al., 2010). However, the precise molecular weight of pinonaldehyde counting all atoms as primary isotopes, <sup>12</sup>C, <sup>1</sup>H and <sup>16</sup>O, is 169.123 Da, which differs significantly from the detected peak at 169.085 Da, and thus the compound is not pinonaldehyde. This finding is in line with the low partitioning coefficient reported for pinonaldehyde (Jenkin, 2004) that
- 20 prevents it from condensing at room temperature. Literature references that reported compounds other than what was identified in this study at the same masses are therefore given in brackets in Table 4 and Sect. S4.

## S2.3 Mass scale

- As noted earlier the ion at 169.085 Da appears to be in the same water series as the ion with mass 187.097 Da. Besides mechanistic implications, these water series prove useful in checking the performance of the PTR-MS: The presence of water
- 25 series at high and low masses (e.g. the primary ion and its water clusters and the pair at 169.085 Da and 187.097 Da) ensures that drift in the autoscaling of the PTR-MS mass scale does not cause any ions to be associated with the wrong mass. If the instrument had shown a drift in the mass scale, the drift would scale with the detected mass: a larger deviation would result for heavier ions. However, since the exact difference of the mass of water (18.011 Da) is found on both ends of the mass spectrum, this systematic error can be excluded. Therefore, the given peak assignment is believed to be accurate.

## S2.4 Charring

When organic material is heated it pyrolyzes, producing char and gas phase fragments including CO and CO<sub>2</sub>, a process commonly referred to as charring. Charring is a known interference with filter-based thermogram methods (Holzinger et al., 2010). The electron affinities of CO and CO<sub>2</sub> are lower than that of water and hence no peaks are detected at the corresponding masses in the PTR-MS. Charring may therefore bias the measurements with implications that include lowered O:C ratios.

## S3 Position-specific isotope measurements

Quantitative nuclear magnetic resonance spectrometry (NMR) tuned for isotopic measurement is a tool for quantifying each isotopic isomer of a given molecule (isotopomers): <sup>2</sup>H (Martin et al., 2006a, b) or <sup>13</sup>C (Caytan et al., 2007b). The latest technique, irm-<sup>13</sup>C NMR, is a recent advancement on the more well established irm-<sup>2</sup>H NMR. It is more of a challenge to quantify the range of variation of <sup>13</sup>C in natural compounds, which is about ten times less for <sup>13</sup>C than <sup>2</sup>H (about 50‰ and 500‰, respectively, on the  $\delta$ -scale). The realization of the method required establishing <sup>13</sup>C NMR conditions to attain a precision of 1‰.

### S3.1 NMR acquisition conditions

Table S1 summarises the NMR acquisition parameters used for isotopic <sup>13</sup>C-NMR. The offset for both <sup>13</sup>C and <sup>1</sup>H was set at the middle of the frequency range observed. An inverse-gated decoupling technique was used to avoid any Nuclear Overhauser Effect and a cosine adiabatic pulse with appropriate phase cycles was employed as proton decoupling sequence (Tenailleau and Akoka, 2007). A repetition time/inter-pulse delay, greater than ten times the longest longitudinal relaxation delay,  $T_1$ , of the compound was used and the acquisition parameters were adjusted to obtain a signal-to-noise ratio (SNR) > 1500. Free induction decay was submitted to an exponential multiplication inducing a line broadening of 2 Hz. The curve fitting was based on a total-line-shape analyses (deconvolution) carried out with a Lorentzian mathematical model using Perch Software (Perch™ NMR Software, <http://www.perchsolutions.com>). From previous experiments (Bayle et al., 2014; Caytan et al., 2007), SNR > 1500 usually leads to a standard deviation for precision of around 0.2‰. Five spectra were recorded for each measurement: the values reported for each carbon are the mean of the five spectra.

### S3.2 Intramolecular <sup>13</sup>C composition calculations

Briefly, the positional isotopic distribution in a molecule was obtained from the <sup>13</sup>C mole fractions  $f_i$  (where  $i$  stands for the C-atom position considered) as follows:  $f_i = S_i/S_{\text{tot}}$ , where  $S_i$  is the <sup>13</sup>C-signal (i.e. the area under the peak associated with the C-atom at position  $i$ , Fig. S3) and  $S_{\text{tot}}$  is the sum of all <sup>13</sup>C-signal areas of the molecule. Each  $S_i$  was corrected to compensate for the slight loss of intensity caused by satellites (<sup>13</sup>C-<sup>13</sup>C interactions) by multiplying by  $(1 + n \times 0.011)$ , where  $n$  is the number of carbon atoms directly attached to the C-atom position  $i$  and 1.1 % (= 0.011) is the average natural <sup>13</sup>C-abundance (see (Silvestre et al., 2009) for a detailed explanation). If  $F_i$  denotes the statistical mole fraction (homogeneous <sup>13</sup>C-

**Table S1.** NMR acquisition parameters used for isotopic  $^{13}\text{C}$ -NMR.  $T_1$  is the longitudinal relaxation delay after addition of the relaxing agent.

|               |                                       |     |
|---------------|---------------------------------------|-----|
| Acquisition   | Spectral width /ppm                   | 238 |
|               | $^{13}\text{C}$ offset frequency /ppm | 110 |
|               | $^1\text{H}$ decoupling offset /ppm   | 4   |
|               | Inter-pulse delay /s                  | 32  |
| FID treatment | Line-broadening /Hz                   | 2   |
| $T_1$ /s      | C <sub>1</sub>                        | 3.0 |
|               | C <sub>2</sub>                        | 2.4 |
|               | C <sub>3</sub>                        | 2.8 |
|               | C <sub>4</sub>                        | 2.5 |
|               | C <sub>5</sub>                        | 3.2 |
|               | C <sub>6</sub>                        | 2.2 |
|               | C <sub>7</sub>                        | 2.2 |
|               | C <sub>8</sub>                        | 2.3 |
|               | C <sub>9</sub>                        | 2.2 |
|               | C <sub>10</sub>                       | 2.3 |

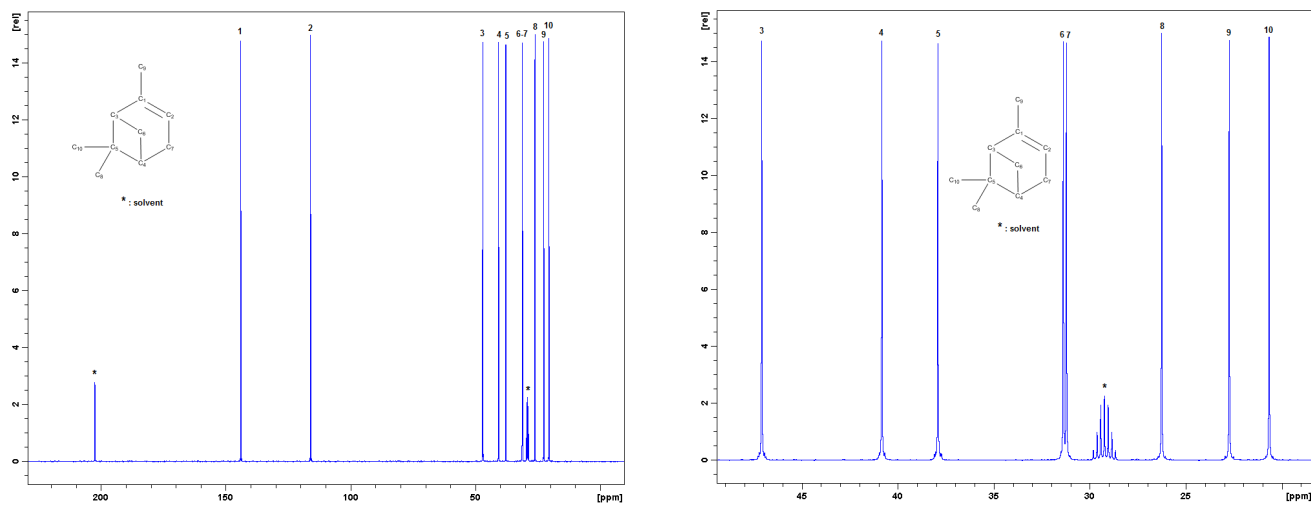

**Figure S3.**  $^{13}\text{C}$  NMR spectrum of  $\alpha$ -pinene in acetone- $\text{d}_6$ . Left pane: full spectrum, right pane: zoom. The carbon atoms are numbered in relation to decreasing  $^{13}\text{C}$  chemical shift in the  $^{13}\text{C}$  NMR spectrum.

distribution) at any C-atom position  $i$ , then the position-specific relative deviation in the  $^{13}\text{C}$ -abundance is  $d_i = f_i/F_i - 1$ . The values of  $d_i$  were converted to delta-values (in ‰) using the isotope composition of the whole molecule,  $\delta_{\text{TC}}^{\circ}(^{13}\text{C})$ , obtained by IR-MS. Thus, the position-specific compositions are expressed as  $\delta_i(^{13}\text{C})$  for each C-atom position of the molecule. Since the peaks of C-6 and C-7 are very close in the  $^{13}\text{C}$  NMR spectrum (right panel in Fig. S3), the average of the two corresponding  $\delta_i(^{13}\text{C})$  values is given for both. Table S2 shows the discussed quantities for one NMR spectrum of the present data set.

**Table S2.** Example calculation of  $\delta_i(^{13}\text{C})$  of  $\alpha$ -pinene from the peak areas in one  $^{13}\text{C}$  NMR spectrum. Corrected areas take the interference from satellites into account. See text for more details. Calculations are based on a global  $^{13}\text{C}/^{12}\text{C}$  ratio of 0.010808 corresponding to  $\delta_{\text{TC}}^{\circ2}(^{13}\text{C}) = -27.7\text{‰}$  with respect to the VPDB scale as measured by IR-MS.

|                                    | C <sub>1</sub> | C <sub>2</sub> | C <sub>3</sub> | C <sub>4</sub> | C <sub>5</sub> | C <sub>6</sub> | C <sub>7</sub> | C <sub>8</sub> | C <sub>9</sub> | C <sub>10</sub> |
|------------------------------------|----------------|----------------|----------------|----------------|----------------|----------------|----------------|----------------|----------------|-----------------|
| Area /a.u.                         | 355.40         | 360.80         | 353.30         | 354.60         | 347.50         | 362.50         | 360.50         | 361.20         | 358.60         | 359.60          |
| Corrected area                     | 367.13         | 368.74         | 364.96         | 366.30         | 362.79         | 366.49         | 364.47         | 365.17         | 362.54         | 363.56          |
| $f_i$                              | 0.1005         | 0.1010         | 0.0999         | 0.1003         | 0.0993         | 0.1003         | 0.0998         | 0.1000         | 0.0993         | 0.0995          |
| $F_i$                              | 1/10           | 1/10           | 1/10           | 1/10           | 1/10           | 1/10           | 1/10           | 1/10           | 1/10           | 1/10            |
| $f_i/F_i$                          | 1.0052         | 1.0097         | 0.9993         | 1.0030         | 0.9934         | 1.0035         | 0.9980         | 0.9999         | 0.9927         | 0.9955          |
| $\delta_i(^{13}\text{C})/\text{‰}$ | -22.5          | -18.2          | -28.3          | -24.7          | -34.2          | -24.2          | -29.7          | -27.8          | -34.8          | -32.1           |

#### **S4 Full list of ions (filter 6)**

The full list of ions detected by PTR-MS from compounds desorbing from filter 6 is printed here and can also be found in the complimentary .csv file 'SI\_filter6.csv'.



SI to C. Meusinger et al. *Chemical and isotopic composition of secondary organic aerosol generated by alpha-pinene ozonolysis*

Full list of ions detected by PTR-MS from compounds desorbing from filter 6 ranked by their concentration

| Rank | m/z     | Formula        | Maximum concentration<br>/ng/m3 | Desorption Temp.<br>of max. conc. /°C | Description                                     | Literature      | H2O relatives                                                      |
|------|---------|----------------|---------------------------------|---------------------------------------|-------------------------------------------------|-----------------|--------------------------------------------------------------------|
| 1    | 169.085 | C9H12O3H+      | 267.79                          | 150                                   |                                                 | a, (c, d)       | +1 (187.093 Da, #72), -1 (151.076 Da, #22), -2 (133.065 Da, #202)  |
| 2    | 81.07   | C6H8H+         | 257.57                          | 150                                   | similar to 95.086 Da (#8)                       |                 | +1 (99.08 Da, #32)                                                 |
| 3    | 125.096 | C8H12OH+       | 221.48                          | 150                                   |                                                 |                 |                                                                    |
| 4    | 43.0172 | C2H2OH+        | 149.37                          | 150                                   |                                                 | a               |                                                                    |
| 5    | 39.0226 | C3H2H+         | 132.93                          | 150                                   |                                                 |                 |                                                                    |
| 6    | 155.07  | C8H10O3H+      | 127.41                          | 150                                   |                                                 | a, (b, d)       | +1 (173.081 Da, #13)                                               |
| 7    | 41.0381 | C3H4H+         | 111.32                          | 150                                   |                                                 | (a)             |                                                                    |
| 8    | 59.0491 | C3H6O+         | 110.01                          | 150                                   | Acetone                                         | a, b, c         |                                                                    |
| 9    | 95.0861 | C7H10H+        | 107.5                           | 150                                   | similar to 81.07 Da (#1)                        | (d)             |                                                                    |
| 10   | 127.075 | C7H10O2H+      | 69.69                           | 150                                   |                                                 | a, c            |                                                                    |
| 11   | 83.0496 | C5H6O+         | 66.57                           | 150                                   |                                                 | (a), c          | +1 (101.06 Da, #62), -1 (65.04 Da, #96)                            |
| 12   | 107.086 | C8H10H+        | 64.79                           | 150                                   |                                                 | (a)             |                                                                    |
| 13   | 173.079 | C8H12O4H+      | 58.75                           | 150                                   | norpinic acid                                   | b, e, g, (b, e) | -1 (155.07 Da, #6)                                                 |
| 14   | 45.033  | C2H4O+         | 58.56                           | 100                                   | Acetaldehyde                                    | a, b, c         | +1 (63.043 Da, #336)                                               |
| 15   | 85.065  | C5H8O+         | 56.71                           | 150                                   |                                                 |                 |                                                                    |
| 16   | 141.054 | C7H8O3H+       | 56.22                           | 150                                   |                                                 | a, b, c         | +1 (159.065 Da, #63)                                               |
| 17   | 123.081 | C8H10OH+       | 53.69                           | 150                                   |                                                 | (a), b, c       | -1 (105.072 Da, #58)                                               |
| 18   | 67.0546 | C5H6H+         | 50.57                           | 150                                   |                                                 | (d)             |                                                                    |
| 19   | 69.0337 | C4H4O+         | 49.81                           | 150                                   |                                                 | (a)             |                                                                    |
| 20   | 69.0699 | C5H8H+         | 43.6                            | 150                                   |                                                 | (a)             |                                                                    |
| 21   | 171.065 | C8H10O4H+      | 42.34                           | 150                                   | small peak nearby unresolved (norpinonic acid?) | a, c, (e, f, g) | -1 (153.055 Da, not listed)                                        |
| 22   | 151.076 | C9H10O2H+      | 42.12                           | 150                                   |                                                 | (a)             | +1 (169.085 Da, #1), +2 (187.093 Da, #72), -1 (133.065 Da, #202)   |
| 23   | 85.029  | C4H4O2H+       | 40.88                           | 200                                   |                                                 | c               |                                                                    |
| 24   | 153.091 | C9H12O2H+      | 39.97                           | 150                                   |                                                 | c, (g)          | -1 (135.081 Da, #59), -2 (117.070 Da, #152)                        |
| 25   | 141.089 | C8H12O2H+      | 39.91                           | 150                                   | 2,2-Dimethyl-cyclobutyl-1,3-diethanal           | a, b, c, g, (a) |                                                                    |
| 26   | 71.049  | C4H6O+         | 39.63                           | 150                                   | MUK & MACR                                      | (a), b          |                                                                    |
| 27   | 115.076 | C6H10O2H+      | 37.17                           | 150                                   |                                                 | a               | -1 (97.0655 Da, #30)                                               |
| 28   | 181.084 | C10H12O3H+     | 36.81                           | 150                                   |                                                 |                 | +1 (199.095, #67), +2 (217.107 Da, #310), -1 (163.076 Da, #107)    |
| 29   | 55.0534 | C4H6H+         | 35.56                           | 150                                   |                                                 |                 | +1 (73.065 Da, #88)                                                |
| 30   | 97.0655 | C6H8O+         | 29.16                           | 150                                   |                                                 | a               | +1 (115.076 Da, #27)                                               |
| 31   | 170.089 | 13CC8H12O3H+   | 27.96                           | 150                                   |                                                 | (a)             | +1 (188.096, #219), -1 (152.080, #120), -2 (unresolved)            |
| 32   | 99.0807 | C6H10OH+       | 27.48                           | 150                                   |                                                 | (a)             | -1 (81.07 Da, #2)                                                  |
| 33   | 165.09  | C10H12O2H+     | 26.62                           | 350                                   |                                                 | a               |                                                                    |
| 34   | 79.0547 | C6H6H+         | 26.36                           | 150                                   |                                                 | a               |                                                                    |
| 35   | 57.0698 | C4H8H+         | 26.3                            | 150                                   |                                                 |                 |                                                                    |
| 36   | 183.099 | C10H14O3H+     | 26                              | 150                                   | C109CO, 4-Oxopinonaldehyde                      | a, e, f, g, h   | +1 (201.117 Da, #239), +2 (not resolved)                           |
| 37   | 83.085  | C6H10H+        | 25.48                           | 150                                   |                                                 | (a)             |                                                                    |
| 38   | 109.101 | C8H12H+        | 25.45                           | 150                                   |                                                 |                 |                                                                    |
| 39   | 125.06  | C7H8O2H+       | 25.36                           | 150                                   |                                                 | a, c            | not well resolved                                                  |
| 40   | 151.111 | C10H14OH+      | 24.1                            | 150                                   |                                                 |                 |                                                                    |
| 41   | 139.04  | C7H6O3H+       | 22.68                           | 150                                   |                                                 | a, c            | +1 (157.05 Da, #50)                                                |
| 42   | 93.0697 | C7H8H+         | 21.98                           | 150                                   |                                                 |                 |                                                                    |
| 43   | 109.066 | C7H8O+         | 21.75                           | 150                                   |                                                 |                 |                                                                    |
| 44   | 126.099 | 13C7H12O2H+    | 20.59                           | 150                                   |                                                 |                 |                                                                    |
| 45   | 57.0337 | C3H4O+         | 20.41                           | 100                                   |                                                 | c               | +1 (75.044 Da, #48)                                                |
| 46   | 47.0126 | CH2O2H+        | 19.99                           | 150                                   |                                                 | a, c            |                                                                    |
| 47   | 95.0576 | C5H6N2H+       | 19.81                           | 150                                   |                                                 |                 |                                                                    |
| 48   | 75.044  | C3H6O2H+       | 19.79                           | 100                                   |                                                 | a               | -1 (57.033 Da, #45)                                                |
| 49   | 129.055 | C6H8O3H+       | 19.64                           | 150                                   |                                                 | a, c            |                                                                    |
| 50   | 157.05  | C7H8O4H+       | 18.8                            | 150                                   | CO235C6CHO                                      | c, h            | -1 (139.04 Da, #41)                                                |
| 51   | 171.098 | 13CC11H151N1H+ | 18.75                           | 150                                   | norpinonic acid (?), C9H14O3H+                  | f, g            |                                                                    |
| 52   | 119.085 | C9H10H+        | 17.71                           | 150                                   |                                                 |                 |                                                                    |
| 53   | 143.07  | C7H10O3H+      | 17.46                           | 200                                   |                                                 | a, c            |                                                                    |
| 54   | 167.104 | C5H14O4N2H+    | 17.17                           | 150                                   |                                                 |                 | +1 (185.118 Da, #116), -1 (149.098 Da, #134)                       |
| 55   | 123.114 | C9H14H+        | 15.99                           | 150                                   |                                                 |                 |                                                                    |
| 56   | 139.075 | C8H10O2H+      | 15.98                           | 150                                   |                                                 | a, c            | -1 (121.068, #101), +1 (157.087, #64)                              |
| 57   | 113.06  | C6H8O2H+       | 15.96                           | 150                                   |                                                 | a, b, c         |                                                                    |
| 58   | 105.071 | C8H8H+         | 15.86                           | 150                                   |                                                 | b               | +1 (123.081 Da, #17)                                               |
| 59   | 135.081 | C9H10OH+       | 15.02                           | 150                                   |                                                 |                 | +1 (153.091 Da, #24), -1 (117.070 Da, #152)                        |
| 60   | 61.0286 | C2H4O2H+       | 14.8                            | 150                                   | Acetic acid                                     | c               |                                                                    |
| 61   | 87.0445 | C4H6O2H+       | 14.59                           | 150                                   |                                                 | a, c            |                                                                    |
| 62   | 101.06  | C5H8O2H+       | 14.4                            | 150                                   |                                                 | c               | -1 (83.0496 Da, #11), -2 (65.04 Da, #96)                           |
| 63   | 159.065 | C7H10O4H+      | 14.27                           | 150                                   | C811OH                                          | b, h            | -1 (141.054 Da, #16)                                               |
| 64   | 157.083 | C8H12O3H+      | 13.94                           | 150                                   | C721CHO                                         | h               | -1 (139.075 Da, #56), -2 (121.068 Da, #101)                        |
| 65   | 111.08  | C7H10OH+       | 13.8                            | 150                                   |                                                 | a, b            |                                                                    |
| 66   | 55.0182 | C3H2O+         | 13.36                           | 150                                   |                                                 |                 |                                                                    |
| 67   | 199.093 | C5H14O6N2H+    | 12.87                           | 150                                   | oxopinonic acid, keto-pinonic acid              | e, g            | -1 (181.084 Da, #28), -2 (163.076 Da, #107), +1 (217.107 Da, #310) |
| 68   | 82.0738 | 13CC5H8H+      | 12.15                           | 150                                   |                                                 |                 |                                                                    |
| 69   | 156.074 | 13C7H10O3H+    | 11.91                           | 150                                   |                                                 |                 |                                                                    |
| 70   | 145.05  | C6H8O4H+       | 11.9                            | 150                                   |                                                 | b               |                                                                    |
| 71   | 111.045 | C6H6O2H+       | 11.87                           | 150                                   |                                                 | a, b, c         |                                                                    |
| 72   | 187.093 | C9H14O4H+      | 11.37                           | 150                                   | pinic acid, 10-OH norpinonic acid, PINIC        | e, f, g, h      | -1 (169.085 Da, #1), -2 (151.076 Da, #22), -3 (133.065 Da, #202)   |
| 73   | 95.0497 | C6H6O+         | 11.09                           | 150                                   |                                                 |                 | -1 (77.040, #213)                                                  |
| 74   | 139.109 | C9H14OH+       | 10.82                           | 150                                   | nopinane (?)                                    | a, f            | -1 (121.103 Da, #100)                                              |
| 75   | 81.0353 | C5H4O+         | 10.49                           | 150                                   |                                                 |                 |                                                                    |
| 76   | 97.058  | no match       | 10.35                           | 150                                   |                                                 |                 |                                                                    |
| 77   | 137.095 | C9H12OH+       | 9.87                            | 150                                   |                                                 |                 |                                                                    |
| 78   | 111.053 | C5H6O2N2H+     | 9.67                            | 150                                   |                                                 | a               |                                                                    |
| 79   | 73.0283 | C3H4O2H+       | 9.43                            | 150                                   |                                                 | a, c            |                                                                    |
| 80   | 113.024 | C5H4O3H+       | 9.18                            | 200                                   |                                                 | a, b, c         | -1 (95.020 Da, #144)                                               |
| 81   | 53.0385 | C4H4H+         | 8.95                            | 150                                   |                                                 |                 |                                                                    |
| 82   | 98.0444 | C5H6O2H+       | 8.83                            | 150                                   |                                                 | c               |                                                                    |
| 83   | 96.09   | 13CC6H10H+     | 8.82                            | 150                                   |                                                 |                 |                                                                    |

| Rank | m/z     | Formula        | Maximum concentration<br>/ng/m3 | Desorption Temp.<br>of max. conc. /°C | Description                                             | Literature    | H2O relatives                                                  |
|------|---------|----------------|---------------------------------|---------------------------------------|---------------------------------------------------------|---------------|----------------------------------------------------------------|
| 84   | 137.06  | C8H8O2H+       | 8.23                            | 150                                   |                                                         |               |                                                                |
| 85   | 109.058 | C2H8O3N2H+     | 8.16                            | 150                                   |                                                         |               |                                                                |
| 86   | 93.062  | no match       | 8.11                            | 150                                   |                                                         |               |                                                                |
| 87   | 129.087 | no match       | 8.06                            | 150                                   |                                                         | a             |                                                                |
| 88   | 73.0648 | C4H8OH+        | 8.05                            | 150                                   |                                                         | a             | -1 (55.0534 Da, #29)                                           |
| 89   | 99.0085 | C4H2O3H+       | 8.01                            | 200                                   |                                                         |               |                                                                |
| 90   | 128.078 | 13CC6H10O2H+   | 7.65                            | 150                                   |                                                         |               |                                                                |
| 91   | 68.9974 | no match       | 7.56                            | 150                                   |                                                         |               |                                                                |
| 92   | 95.042  | no match       | 7.51                            | 150                                   |                                                         |               |                                                                |
| 93   | 214.087 | C13H11O2NH+    | 7.45                            | 150                                   |                                                         |               |                                                                |
| 94   | 167.071 | C9H10O3H+      | 7.33                            | 150                                   |                                                         |               |                                                                |
| 95   | 97.0292 | C5H4O2H+       | 7.33                            | 150                                   |                                                         | a, c          |                                                                |
| 96   | 65.039  | C5H4H+         | 7.32                            | 150                                   |                                                         |               | +1 (83.0496 Da, #11), +2 (101.06 Da, #62)                      |
| 97   | 123.052 | no match       | 7.27                            | 150                                   |                                                         |               |                                                                |
| 98   | 197.079 | C10H12O4H+     | 7.23                            | 150                                   |                                                         |               |                                                                |
| 99   | 173.147 | no match       | 6.88                            | 150                                   |                                                         |               |                                                                |
| 100  | 121.101 | C9H12H+        | 6.86                            | 150                                   |                                                         |               | +1 (139.109 Da, #74)                                           |
| 101  | 121.065 | C8H8OH+        | 6.86                            | 150                                   |                                                         |               | +1 (139.075 Da, #56), +2 (157.080, #64)                        |
| 102  | 127.037 | C6H6O3H+       | 6.62                            | 150                                   |                                                         | c             |                                                                |
| 103  | 85.0993 | C6H12H+        | 6.44                            | 150                                   |                                                         |               |                                                                |
| 104  | 651.119 | no match       | 6.37                            | 150                                   |                                                         |               |                                                                |
| 105  | 185.079 | C9H12O4H+      | 6.35                            | 150                                   |                                                         | c             |                                                                |
| 106  | 725.102 | no match       | 6.26                            | 150                                   |                                                         |               |                                                                |
| 107  | 163.075 | C10H10O2H+     | 5.95                            | 150                                   |                                                         | b             | +1 (181.084 Da, #28), +2 (199.095, #67), +3 (217.107 Da, #310) |
| 108  | 82.0718 | 13C5H8BH+      | 5.95                            | 150                                   |                                                         |               |                                                                |
| 109  | 124.084 | 13CC7H10OH+    | 5.84                            | 150                                   |                                                         |               |                                                                |
| 110  | 108.089 | 13CC7H10H+     | 5.8                             | 150                                   |                                                         |               |                                                                |
| 111  | 91.0549 | C7H6H+         | 5.76                            | 150                                   |                                                         |               |                                                                |
| 112  | 125.023 | C6H4O3H+       | 5.67                            | 150                                   |                                                         |               |                                                                |
| 113  | 174.083 | 13CC7H12O4H+   | 5.67                            | 150                                   | C89O2                                                   | h             |                                                                |
| 114  | 107.049 | C7H6OH+        | 5.42                            | 150                                   |                                                         |               |                                                                |
| 115  | 33.0327 | C14OH+         | 5.32                            | 150                                   | Methanol                                                |               |                                                                |
| 116  | 185.117 | C10H16O3H+     | 5.31                            | 150                                   | pinonic acid, OH-pinonaldehyde, PINONIC, C107OH, C109OH | a, e, f, g, h | -1 (167.105 Da, #54), -2 (149.098 Da, #134)                    |
| 117  | 172.068 | 13CC7H10O4H+   | 5.1                             | 150                                   |                                                         |               |                                                                |
| 118  | 101.052 | no match       | 4.77                            | 150                                   |                                                         |               |                                                                |
| 119  | 142.058 | 13CC6H8O3H+    | 4.69                            | 150                                   |                                                         |               |                                                                |
| 120  | 152.079 | 13CC8H10O2H+   | 4.54                            | 150                                   |                                                         |               | +1 (170.089, #31), +2 (188.096, #219), -1 (unresolved)         |
| 121  | 171.148 | C9H18ON2H+     | 4.49                            | 150                                   |                                                         |               |                                                                |
| 122  | 43.0536 | C3H6H+         | 4.47                            | 150                                   |                                                         |               |                                                                |
| 123  | 115.04  | C5H6O3H+       | 4.4                             | 150                                   |                                                         | a, c          |                                                                |
| 124  | 40.0256 | 13CC2H2H+      | 4.29                            | 150                                   |                                                         |               |                                                                |
| 125  | 154.093 | 13CC8H12O2H+   | 4.29                            | 150                                   |                                                         |               |                                                                |
| 126  | 182.088 | 13CC9H12O3H+   | 4.28                            | 150                                   |                                                         |               | +1 (200.097 Da, #197), +2 (218.109 Da, not resolved)           |
| 127  | 70.0734 | 13CC4H9H+      | 4.12                            | 150                                   |                                                         |               |                                                                |
| 128  | 71.0812 | no match       | 4.06                            | 150                                   |                                                         |               |                                                                |
| 129  | 60.0521 | 13CC2H6OH+     | 4.02                            | 150                                   |                                                         |               |                                                                |
| 130  | 123.043 | C7H6O2H+       | 3.99                            | 150                                   |                                                         |               |                                                                |
| 131  | 183.163 | no match       | 3.95                            | 150                                   |                                                         |               |                                                                |
| 132  | 141.003 | C2H4O7H+       | 3.94                            | 150                                   |                                                         |               |                                                                |
| 133  | 84.0525 | 13CC4H6OH+     | 3.88                            | 150                                   |                                                         |               |                                                                |
| 134  | 149.095 | C10H12OH+      | 3.84                            | 150                                   | methylehchavicol (Holsi2005)                            | b             | +1 (167.105, #54), +2 (185.118 Da, #116)                       |
| 135  | 211.093 | C6H14O6N2H+    | 3.81                            | 150                                   |                                                         |               |                                                                |
| 136  | 42.0414 | 13CC2H4H+      | 3.72                            | 150                                   |                                                         |               |                                                                |
| 137  | 142.093 | 13CC7H12O2H+   | 3.65                            | 150                                   |                                                         |               |                                                                |
| 138  | 741.107 | no match       | 3.62                            | 150                                   |                                                         |               |                                                                |
| 139  | 121.093 | no match       | 3.54                            | 150                                   |                                                         |               |                                                                |
| 140  | 44.0205 | 13CO2H2OH+     | 3.31                            | 150                                   |                                                         |               |                                                                |
| 141  | 653.119 | no match       | 3.28                            | 150                                   |                                                         |               |                                                                |
| 142  | 86.068  | 13CC4H8OH+     | 3.28                            | 150                                   |                                                         |               |                                                                |
| 143  | 184.103 | 13C2H15AO3H+   | 3.22                            | 150                                   |                                                         |               |                                                                |
| 144  | 95.0141 | C5H2O2H+       | 3.2                             | 200                                   |                                                         | b             | +1 (113.024 Da, #80)                                           |
| 145  | 145.089 | no match       | 3.16                            | 150                                   |                                                         |               |                                                                |
| 146  | 166.094 | 13CC9H12O2H+   | 3.13                            | 350                                   |                                                         |               |                                                                |
| 147  | 87.0796 | C5H10OH+       | 3.02                            | 150                                   | MBO (holsi 2005)                                        | a, b          |                                                                |
| 148  | 109.031 | C6H4O2H+       | 2.96                            | 150                                   |                                                         |               |                                                                |
| 149  | 101.095 | C6H12OH+       | 2.95                            | 150                                   |                                                         |               |                                                                |
| 150  | 99.0371 | no match       | 2.95                            | 150                                   |                                                         |               |                                                                |
| 151  | 101.024 | C4H4O3H+       | 2.95                            | 150                                   |                                                         | c             |                                                                |
| 152  | 117.069 | C9H8H+         | 2.87                            | 150                                   |                                                         |               | +1 (135.081 Da, #58), +2 (153.091 Da, #24)                     |
| 153  | 103.04  | C4H6O3H+       | 2.86                            | 100                                   |                                                         |               |                                                                |
| 154  | 152.112 | 13CC4H14O3N2H+ | 2.85                            | 150                                   |                                                         |               |                                                                |
| 155  | 149.024 | C8H4O3H+       | 2.83                            | 150                                   |                                                         | c             |                                                                |
| 156  | 110.069 | 13CC6H8OH+     | 2.6                             | 150                                   |                                                         |               |                                                                |
| 157  | 96.0531 | 13CC5H6OH+     | 2.57                            | 150                                   |                                                         |               |                                                                |
| 158  | 126.063 | 13CC6H8O2H+    | 2.54                            | 150                                   |                                                         |               |                                                                |
| 159  | 429.077 | no match       | 2.5                             | 150                                   |                                                         |               |                                                                |
| 160  | 68.058  | 13CC4H6H+      | 2.48                            | 150                                   |                                                         |               |                                                                |
| 161  | 83.0138 | C4H2O2H+       | 2.47                            | 150                                   |                                                         |               |                                                                |
| 162  | 42.9985 | no match       | 2.43                            | 150                                   |                                                         |               |                                                                |
| 163  | 147.08  | C10H10OH+      | 2.41                            | 150                                   |                                                         |               |                                                                |
| 164  | 110.105 | 13CC7H12H+     | 2.35                            | 150                                   |                                                         |               |                                                                |
| 165  | 103.048 | C3H6O2N2H+     | 2.34                            | 100                                   |                                                         |               |                                                                |
| 166  | 70.038  | 13CC3H4O2H+    | 2.3                             | 150                                   |                                                         |               |                                                                |
| 167  | 116.08  | 13CC5H10O2H+   | 2.27                            | 150                                   |                                                         |               |                                                                |
| 168  | 71.0136 | C3H2O2H+       | 2.27                            | 200                                   |                                                         |               |                                                                |

| Rank | m/z     | Formula        | Maximum concentration<br>/ng/m3 | Desorption Temp.<br>of max. conc. /°C | Description                                                               | Literature | H2O relatives                                                   |
|------|---------|----------------|---------------------------------|---------------------------------------|---------------------------------------------------------------------------|------------|-----------------------------------------------------------------|
| 169  | 55.0103 | no match       | 2.24                            | 150                                   |                                                                           |            |                                                                 |
| 170  | 652.095 | no match       | 2.24                            | 150                                   |                                                                           |            |                                                                 |
| 171  | 187.068 | no match       | 2.23                            | 150                                   |                                                                           |            |                                                                 |
| 172  | 72.052  | 13CC3H6OH+     | 2.23                            | 150                                   |                                                                           |            |                                                                 |
| 173  | 94.0733 | 13CC6H8H+      | 2.23                            | 150                                   |                                                                           |            |                                                                 |
| 174  | 667.131 | no match       | 2.22                            | 150                                   |                                                                           |            |                                                                 |
| 175  | 117.061 | no match       | 2.22                            | 150                                   |                                                                           | a          |                                                                 |
| 176  | 133.097 | C5H12O2N2H+    | 2.18                            | 150                                   |                                                                           |            |                                                                 |
| 177  | 215.09  | C10H14O5H+     | 2.15                            | 150                                   |                                                                           |            |                                                                 |
| 178  | 652.128 | no match       | 2.11                            | 150                                   |                                                                           |            |                                                                 |
| 179  | 187.06  | CBH10O5H+      | 2.11                            | 200                                   |                                                                           |            |                                                                 |
| 180  | 98.0687 | 13CS5H8OH+     | 2.1                             | 150                                   |                                                                           |            |                                                                 |
| 181  | 93.0396 | C6H4OH+        | 2.08                            | 150                                   |                                                                           |            |                                                                 |
| 182  | 168.107 | 13C9H14O2H+    | 2.02                            | 150                                   |                                                                           |            |                                                                 |
| 183  | 31.017  | CH2OH+         | 2.01                            | 150                                   | Formaldehyde                                                              |            |                                                                 |
| 184  | 100.084 | 13CS5H10OH+    | 1.98                            | 150                                   |                                                                           |            |                                                                 |
| 185  | 119.05  | CBH6OH+        | 1.87                            | 150                                   |                                                                           |            |                                                                 |
| 186  | 86.0328 | 13CC3H4O2H+    | 1.87                            | 200                                   |                                                                           |            |                                                                 |
| 187  | 140.044 | 13CC6H6O3H+    | 1.86                            | 150                                   |                                                                           |            |                                                                 |
| 188  | 120.088 | 13CC8H10H+     | 1.85                            | 150                                   |                                                                           |            |                                                                 |
| 189  | 168.676 | no match       | 1.83                            | 150                                   |                                                                           |            |                                                                 |
| 190  | 124.819 | no match       | 1.81                            | 150                                   |                                                                           |            |                                                                 |
| 191  | 159.131 | no match       | 1.79                            | 150                                   |                                                                           |            |                                                                 |
| 192  | 239.23  | no match       | 1.77                            | 150                                   |                                                                           |            |                                                                 |
| 193  | 229.102 | C6H16O7N2H+    | 1.76                            | 150                                   |                                                                           |            |                                                                 |
| 194  | 56.0575 | 13C3H6H+       | 1.71                            | 150                                   |                                                                           |            |                                                                 |
| 195  | 84.0884 | 13CSH10H+      | 1.71                            | 150                                   |                                                                           |            |                                                                 |
| 196  | 277.137 | C11H20O6N2H+   | 1.68                            | 200                                   |                                                                           |            |                                                                 |
| 197  | 200.097 | 13CC4H14O6N2H+ | 1.66                            | 150                                   | C10H15O4H+, C107O2                                                        | h          | +1 (218.109 Da, not resolved), -1 (182.091 Da, #126)            |
| 198  | 149.062 | 13CC4H9O4NH+   | 1.64                            | 150                                   |                                                                           |            |                                                                 |
| 199  | 136.084 | 13CC8H10OH+    | 1.63                            | 150                                   |                                                                           |            |                                                                 |
| 200  | 80.0576 | 13CS5H8H+      | 1.62                            | 150                                   |                                                                           |            |                                                                 |
| 201  | 119.036 | C4H6O4H+       | 1.61                            | 150                                   |                                                                           |            |                                                                 |
| 202  | 133.065 | C9H8OH+        | 1.6                             | 150                                   |                                                                           | a          | +1 (151.076 Da, #22), +2 (169.085 Da, #1), +3 (187.093 Da, #72) |
| 203  | 654.111 | no match       | 1.57                            | 150                                   |                                                                           |            |                                                                 |
| 204  | 199.161 | no match       | 1.56                            | 150                                   |                                                                           |            |                                                                 |
| 205  | 140.078 | 13CC7H10O2H+   | 1.56                            | 150                                   |                                                                           |            |                                                                 |
| 206  | 80.9047 | no match       | 1.56                            | 150                                   |                                                                           |            |                                                                 |
| 207  | 154.934 | no match       | 1.55                            | 150                                   |                                                                           |            |                                                                 |
| 208  | 179.07  | C10H10O3H+     | 1.55                            | 350                                   |                                                                           | b          | -1 (161.072, #401)                                              |
| 209  | 121.028 | C7H4O2H+       | 1.51                            | 150                                   |                                                                           |            |                                                                 |
| 210  | 213.074 | C10H12O5H+     | 1.5                             | 200                                   |                                                                           | b          | -1 (195.068 Da, #265)                                           |
| 211  | 130.058 | 13C5H8O3H+     | 1.49                            | 150                                   |                                                                           |            |                                                                 |
| 212  | 103.083 | no match       | 1.48                            | 200                                   |                                                                           |            |                                                                 |
| 213  | 77.0394 | C6H4H+         | 1.46                            | 150                                   |                                                                           |            | +1 (95.0497 Da, #73)                                            |
| 214  | 80.938  | no match       | 1.43                            | 150                                   |                                                                           |            |                                                                 |
| 215  | 106.074 | 13CC7H8H+      | 1.43                            | 150                                   |                                                                           |            |                                                                 |
| 216  | 144.073 | 13CC6H10O3H+   | 1.42                            | 200                                   |                                                                           |            |                                                                 |
| 217  | 371.092 | no match       | 1.41                            | 150                                   |                                                                           |            |                                                                 |
| 218  | 158.086 | no match       | 1.4                             | 150                                   |                                                                           |            |                                                                 |
| 219  | 188.096 | no match       | 1.39                            | 150                                   | C97O2                                                                     | h          | -1 (170.089, #31), -2 (152.080, #120), -3 (unresolved)          |
| 220  | 179.098 | no match       | 1.37                            | 350                                   |                                                                           |            |                                                                 |
| 221  | 158.053 | 13CC6H8O4H+    | 1.36                            | 150                                   |                                                                           |            |                                                                 |
| 222  | 80.9795 | no match       | 1.34                            | 150                                   |                                                                           |            |                                                                 |
| 223  | 46.0305 | C9O9NH+        | 1.33                            | 150                                   |                                                                           |            |                                                                 |
| 224  | 59.0089 | no match       | 1.32                            | 150                                   |                                                                           |            |                                                                 |
| 225  | 669.137 | no match       | 1.27                            | 150                                   |                                                                           |            |                                                                 |
| 226  | 257.246 | C16H13O2H+     | 1.27                            | 150                                   |                                                                           |            |                                                                 |
| 227  | 223.097 | C12H14O4H+     | 1.27                            | 150                                   |                                                                           |            |                                                                 |
| 228  | 355.063 | no match       | 1.26                            | 150                                   |                                                                           |            |                                                                 |
| 229  | 145.104 | 13CC6H13O2NH+  | 1.26                            | 150                                   |                                                                           |            |                                                                 |
| 230  | 65.022  | 13CC3NH+       | 1.25                            | 150                                   |                                                                           |            |                                                                 |
| 231  | 209.189 | C14H24OH+      | 1.23                            | 100                                   |                                                                           |            |                                                                 |
| 232  | 160.069 | 13CC6H10O4H+   | 1.22                            | 150                                   |                                                                           |            |                                                                 |
| 233  | 193.117 | C7H16O4N2H+    | 1.22                            | 150                                   |                                                                           |            |                                                                 |
| 234  | 112.083 | 13CC6H10OH+    | 1.2                             | 150                                   |                                                                           |            |                                                                 |
| 235  | 140.114 | 13CC8H14OH+    | 1.19                            | 150                                   |                                                                           |            |                                                                 |
| 236  | 285.268 | no match       | 1.17                            | 150                                   |                                                                           |            |                                                                 |
| 237  | 154.926 | no match       | 1.16                            | 150                                   |                                                                           |            |                                                                 |
| 238  | 279.155 | C13H22O6N2H+   | 1.16                            | 200                                   |                                                                           |            |                                                                 |
| 239  | 201.117 | no match       | 1.13                            | 150                                   | C107OOH, C109OOH, HOPINONIC, C108OH, 10-OH pinonic acid, OH-pinonaldehyde | e, f, g, h | -1 (183.099 Da, #36) +1 (not resolved)                          |
| 240  | 267.258 | no match       | 1.13                            | 150                                   |                                                                           |            |                                                                 |
| 241  | 80.8614 | no match       | 1.12                            | 150                                   |                                                                           |            |                                                                 |
| 242  | 112.048 | 13CS5H6O2H+    | 1.11                            | 150                                   |                                                                           |            |                                                                 |
| 243  | 198.084 | 13CS9H12O4H+   | 1.09                            | 150                                   |                                                                           |            |                                                                 |
| 244  | 131.07  | C6H10O3H+      | 1.09                            | 150                                   |                                                                           |            |                                                                 |
| 245  | 189.084 | C7H12O4N2H+    | 1.09                            | 150                                   |                                                                           |            |                                                                 |
| 246  | 114.065 | 13CS5H8O2H+    | 1.09                            | 150                                   |                                                                           |            |                                                                 |
| 247  | 101.016 | no match       | 1.09                            | 150                                   |                                                                           |            |                                                                 |
| 248  | 122.104 | 13CC8H12H+     | 1.08                            | 150                                   |                                                                           |            |                                                                 |
| 249  | 138.098 | 13CC8H12OH+    | 1.06                            | 150                                   |                                                                           |            |                                                                 |
| 250  | 102.062 | 13CC4H8O2H+    | 1.05                            | 150                                   |                                                                           |            |                                                                 |
| 251  | 105.036 | 13CC2H5O3NH+   | 1.04                            | 150                                   |                                                                           |            |                                                                 |
| 252  | 168.08  | C12H9NH+       | 1.03                            | 150                                   |                                                                           |            |                                                                 |
| 253  | 168.649 | no match       | 0.99                            | 150                                   |                                                                           |            |                                                                 |

| Rank | m/z     | Formula        | Maximum concentration | Desorption Temp.  | Description | Literature | H2O relatives                                                  |
|------|---------|----------------|-----------------------|-------------------|-------------|------------|----------------------------------------------------------------|
|      |         |                | /ng/m3                | of max. conc. /°C |             |            |                                                                |
| 254  | 195.095 | C6H14O5N2H+    | 0.98                  | 150               |             |            |                                                                |
| 255  | 257.226 | C19H28H+       | 0.98                  | 150               |             |            |                                                                |
| 256  | 80.9714 | no match       | 0.97                  | 150               |             |            |                                                                |
| 257  | 154.711 | no match       | 0.97                  | 150               |             |            |                                                                |
| 258  | 124.785 | no match       | 0.96                  | 150               |             |            |                                                                |
| 259  | 138.066 | 13C7H8O2H+     | 0.94                  | 150               |             |            |                                                                |
| 260  | 269.165 | C17H20O2N2H+   | 0.92                  | 150               |             |            |                                                                |
| 261  | 82.0405 | no match       | 0.92                  | 150               |             |            |                                                                |
| 262  | 122.068 | 13C7H8OH+      | 0.9                   | 150               |             |            |                                                                |
| 263  | 74.0636 | no match       | 0.89                  | 150               |             |            |                                                                |
| 264  | 133.056 | no match       | 0.89                  | 150               |             |            |                                                                |
| 265  | 195.068 | C10H10O4H+     | 0.89                  | 200               |             | b          | +1 (213.074 Da, #210)                                          |
| 266  | 131.088 | 13C5H11O2NH+   | 0.89                  | 150               |             |            |                                                                |
| 267  | 150.726 | no match       | 0.86                  | 150               |             |            |                                                                |
| 268  | 131.034 | C5H6O4H+       | 0.86                  | 150               |             |            |                                                                |
| 269  | 201.076 | C9H12O5H+      | 0.84                  | 150               |             |            |                                                                |
| 270  | 110.993 | CH2O6H+        | 0.83                  | 150               |             |            |                                                                |
| 271  | 431.076 | no match       | 0.81                  | 150               |             |            |                                                                |
| 272  | 140.928 | no match       | 0.81                  | 150               |             |            |                                                                |
| 273  | 578.098 | no match       | 0.79                  | 100               |             |            |                                                                |
| 274  | 164.077 | 13C9H10O2H+    | 0.78                  | 150               |             |            |                                                                |
| 275  | 58.072  | 13C3H8H+       | 0.77                  | 150               |             |            |                                                                |
| 276  | 186.081 | 13C3H12O6N2H+  | 0.76                  | 150               |             |            |                                                                |
| 277  | 124.794 | no match       | 0.76                  | 150               |             |            |                                                                |
| 278  | 94.8514 | no match       | 0.76                  | 150               |             |            |                                                                |
| 279  | 68.97   | no match       | 0.76                  | 150               |             |            |                                                                |
| 280  | 202.076 | 13C3H12O7N2H+  | 0.75                  | 150               |             |            |                                                                |
| 281  | 87.01   | C3H2O3H+       | 0.75                  | 150               |             |            |                                                                |
| 282  | 186.117 | no match       | 0.74                  | 150               |             |            |                                                                |
| 283  | 241.107 | C12H16O5H+     | 0.74                  | 200               |             |            |                                                                |
| 284  | 42.9903 | no match       | 0.73                  | 150               |             |            |                                                                |
| 285  | 94.8927 | no match       | 0.73                  | 150               |             |            |                                                                |
| 286  | 58.0365 | 13C2H4O4H+     | 0.72                  | 100               |             |            |                                                                |
| 287  | 94.9561 | no match       | 0.71                  | 150               |             |            |                                                                |
| 288  | 98.0605 | C5H7O6H+       | 0.71                  | 150               |             |            |                                                                |
| 289  | 150.098 | 13C9H12O4H+    | 0.71                  | 150               |             |            |                                                                |
| 290  | 577.101 | no match       | 0.71                  | 100               |             |            |                                                                |
| 291  | 146.053 | 13C5H8O4H+     | 0.71                  | 150               |             |            |                                                                |
| 292  | 66.0437 | 13C4H4H+       | 0.7                   | 150               |             |            |                                                                |
| 293  | 158.028 | 13C4H4O4N2H+   | 0.69                  | 150               |             |            |                                                                |
| 294  | 76.0484 | 13C2H6O2H+     | 0.69                  | 100               |             |            |                                                                |
| 295  | 88.0483 | 13C3H6O2H+     | 0.69                  | 150               |             |            |                                                                |
| 296  | 204.119 | 13C11H14O4N2H+ | 0.68                  | 150               |             |            |                                                                |
| 297  | 89.0233 | C3H4O3H+       | 0.68                  | 150               |             |            |                                                                |
| 298  | 219.112 | C12H14O2N2H+   | 0.67                  | 350               |             |            |                                                                |
| 299  | 124.049 | 13C6O6O2H+     | 0.66                  | 150               |             |            |                                                                |
| 300  | 116.106 | C6H13ONH+      | 0.66                  | 150               |             |            |                                                                |
| 301  | 154.685 | no match       | 0.66                  | 150               |             |            |                                                                |
| 302  | 193.088 | 13C6H13O5NH+   | 0.66                  | 350               |             |            |                                                                |
| 303  | 108.962 | no match       | 0.66                  | 150               |             |            |                                                                |
| 304  | 447.088 | no match       | 0.65                  | 150               |             |            |                                                                |
| 305  | 114.091 | C6H11ONH+      | 0.65                  | 150               |             |            |                                                                |
| 306  | 211.196 | no match       | 0.64                  | 150               |             |            |                                                                |
| 307  | 227.123 | C7H18O6N2H+    | 0.64                  | 200               |             |            |                                                                |
| 308  | 100.047 | 13C4H6O2H+     | 0.63                  | 150               |             |            |                                                                |
| 309  | 231.095 | C9H14O5N2H+    | 0.63                  | 350               |             |            |                                                                |
| 310  | 217.107 | C10H16O5H+     | 0.63                  | 350               | C108BOH     | f, h       | -1 (199.095, #67), -2 (181.084 Da, #28), -3 (163.076 Da, #107) |
| 311  | 58.0803 | no match       | 0.63                  | 150               |             |            |                                                                |
| 312  | 225.135 | C9H20O6H+      | 0.62                  | 150               |             |            |                                                                |
| 313  | 577.071 | no match       | 0.62                  | 100               |             |            |                                                                |
| 314  | 209.109 | C14H12N2H+     | 0.62                  | 150               |             |            |                                                                |
| 315  | 205.113 | no match       | 0.61                  | 350               | C921OOH     | h          |                                                                |
| 316  | 175.105 | C7H14O3N2H+    | 0.61                  | 150               |             |            |                                                                |
| 317  | 161.096 | C11H12OH+      | 0.61                  | 350               |             |            |                                                                |
| 318  | 212.097 | 13C5H14O6N2H+  | 0.61                  | 150               |             |            |                                                                |
| 319  | 223.119 | C9H18O6H+      | 0.61                  | 150               |             |            |                                                                |
| 320  | 175.08  | 13C6H11O4NH+   | 0.61                  | 150               |             |            |                                                                |
| 321  | 201.092 | C13H12O2H+     | 0.61                  | 150               |             |            |                                                                |
| 322  | 172.15  | 13C8H18ON2H+   | 0.6                   | 150               |             |            |                                                                |
| 323  | 295.147 | C11H22O7N2H+   | 0.6                   | 200               |             |            |                                                                |
| 324  | 108.054 | 13C6H6OH+      | 0.6                   | 150               |             |            |                                                                |
| 325  | 199.17  | C12H22O2H+     | 0.6                   | 150               |             |            |                                                                |
| 326  | 430.084 | no match       | 0.59                  | 150               |             |            |                                                                |
| 327  | 140.919 | no match       | 0.59                  | 150               |             |            |                                                                |
| 328  | 210.117 | 13C6H16O5N2H+  | 0.59                  | 150               |             |            |                                                                |
| 329  | 94.902  | no match       | 0.59                  | 150               |             |            |                                                                |
| 330  | 94.9478 | no match       | 0.59                  | 150               |             |            |                                                                |
| 331  | 130.093 | 13C6H12O2H+    | 0.59                  | 150               |             |            |                                                                |
| 332  | 45.0065 | no match       | 0.59                  | 100               |             |            |                                                                |
| 333  | 177.115 | C8H16O4H+      | 0.58                  | 350               |             |            |                                                                |
| 334  | 229.214 | C14H28O2H+     | 0.57                  | 150               |             |            |                                                                |
| 335  | 56.021  | 13C2H2O2H+     | 0.57                  | 150               |             |            |                                                                |
| 336  | 63.0429 | C2H6O2H+       | 0.57                  | 150               |             |            | -1 (45.033 Da, #14)                                            |
| 337  | 239.137 | C12H18O3N2H+   | 0.57                  | 150               |             |            |                                                                |
| 338  | 168.668 | no match       | 0.57                  | 150               |             |            |                                                                |

| Rank | m/z     | Formula        | Maximum concentration | Desorption Temp.  | Description | Literature | H2O relatives        |
|------|---------|----------------|-----------------------|-------------------|-------------|------------|----------------------|
|      |         |                | /ng/m3                | of max. conc. /°C |             |            |                      |
| 339  | 207.099 | C7H14O5N2H+    | 0.57                  | 350               |             |            |                      |
| 340  | 225.109 | C7H16O6N2H+    | 0.56                  | 150               |             |            |                      |
| 341  | 114.027 | 13CC4H4O3H+    | 0.56                  | 200               |             |            |                      |
| 342  | 190.104 | 13CC10H12ON2H+ | 0.56                  | 150               |             |            |                      |
| 343  | 68.9359 | no match       | 0.55                  | 150               |             |            |                      |
| 344  | 89.0603 | C4H8O2H+       | 0.55                  | 150               |             |            |                      |
| 345  | 430.062 | no match       | 0.54                  | 150               |             |            |                      |
| 346  | 579.095 | no match       | 0.54                  | 100               |             |            |                      |
| 347  | 205.089 | 13CC7H13O5NH+  | 0.53                  | 350               |             |            |                      |
| 348  | 42.933  | no match       | 0.53                  | 150               |             |            |                      |
| 349  | 146.075 | no match       | 0.53                  | 150               |             |            |                      |
| 350  | 299.063 | no match       | 0.53                  | 150               |             |            |                      |
| 351  | 47.046  | no match       | 0.53                  | 150               | etanol      |            |                      |
| 352  | 243.129 | C12H18O9H+     | 0.51                  | 150               |             |            |                      |
| 353  | 216.09  | 13CC4H14O7N2H+ | 0.51                  | 150               | C10802      | h          |                      |
| 354  | 297.155 | C12H24O8H+     | 0.51                  | 150               |             |            |                      |
| 355  | 117.024 | no match       | 0.5                   | 150               |             | a          |                      |
| 356  | 243.231 | C15H30O2H+     | 0.5                   | 150               |             |            |                      |
| 357  | 92.0581 | 13CC6H6H+      | 0.5                   | 150               |             |            |                      |
| 358  | 209.165 | C12H20ON2H+    | 0.49                  | 100               |             |            |                      |
| 359  | 257.128 | C15H16O2N2H+   | 0.49                  | 150               |             |            |                      |
| 360  | 42.9787 | no match       | 0.49                  | 150               |             |            |                      |
| 361  | 593.15  | no match       | 0.48                  | 100               |             |            |                      |
| 362  | 131.08  | C5H10O2N2H+    | 0.48                  | 150               |             |            |                      |
| 363  | 81.2891 | no match       | 0.48                  | 150               |             |            |                      |
| 364  | 102.092 | C5H11ONH+      | 0.47                  | 150               |             |            |                      |
| 365  | 207.13  | no match       | 0.47                  | 350               |             |            |                      |
| 366  | 98.029  | 13CC4H4O2H+    | 0.47                  | 150               |             |            |                      |
| 367  | 267.132 | C13H18O4N2H+   | 0.46                  | 150               |             |            |                      |
| 368  | 41.007  | no match       | 0.46                  | 150               |             |            |                      |
| 369  | 68.0501 | C4H5NH+        | 0.46                  | 150               |             |            |                      |
| 370  | 188.064 | 13CC7H10O5H+   | 0.45                  | 150               |             |            |                      |
| 371  | 58.9874 | no match       | 0.45                  | 150               |             |            |                      |
| 372  | 258.25  | 13CC15H32O2H+  | 0.44                  | 150               |             |            |                      |
| 373  | 180.64  | no match       | 0.44                  | 150               |             |            |                      |
| 374  | 209.083 | 13CC6H13O6NH+  | 0.44                  | 200               |             |            |                      |
| 375  | 215.181 | C16H22H+       | 0.44                  | 150               |             |            |                      |
| 376  | 281.143 | C15H20O5H+     | 0.44                  | 150               |             |            |                      |
| 377  | 225.043 | 13CS5H9O8NH+   | 0.43                  | 150               |             |            |                      |
| 378  | 356.068 | no match       | 0.42                  | 150               |             |            |                      |
| 379  | 58.924  | no match       | 0.42                  | 150               |             |            |                      |
| 380  | 45.9922 | O2N+           | 0.42                  | 150               |             |            |                      |
| 381  | 122.804 | no match       | 0.41                  | 150               |             |            |                      |
| 382  | 42.9554 | no match       | 0.41                  | 150               |             |            |                      |
| 383  | 150.028 | 13CC7H4O3H+    | 0.4                   | 150               |             |            |                      |
| 384  | 94.837  | no match       | 0.4                   | 150               |             |            |                      |
| 385  | 241.178 | C14H24O3H+     | 0.4                   | 150               |             |            |                      |
| 386  | 112.041 | C5H5O2NH+      | 0.4                   | 150               |             |            |                      |
| 387  | 74.0313 | 13CC2H4O2H+    | 0.4                   | 150               |             |            |                      |
| 388  | 42.9091 | no match       | 0.4                   | 150               |             |            |                      |
| 389  | 261.137 | no match       | 0.4                   | 350               |             |            |                      |
| 390  | 225.216 | no match       | 0.39                  | 150               |             |            |                      |
| 391  | 283.147 | C17H18O2N2H+   | 0.39                  | 150               |             |            |                      |
| 392  | 38.9477 | no match       | 0.39                  | 150               |             |            |                      |
| 393  | 357.062 | no match       | 0.39                  | 150               |             |            |                      |
| 394  | 106.83  | no match       | 0.38                  | 150               |             |            |                      |
| 395  | 44.049  | C2H5NH+        | 0.38                  | 150               |             |            |                      |
| 396  | 201.163 | C15H20H+       | 0.37                  | 150               |             |            |                      |
| 397  | 62.0316 | 13CO4H4O2H+    | 0.36                  | 150               |             |            |                      |
| 398  | 42.0333 | C2H3NH+        | 0.36                  | 150               |             |            |                      |
| 399  | 46.991  | O215N+         | 0.36                  | 150               |             |            |                      |
| 400  | 81.287  | no match       | 0.35                  | 150               |             |            |                      |
| 401  | 161.059 | C10H8O2H+      | 0.35                  | 150               |             |            | +1 (179.07 Da, #208) |
| 402  | 58.9788 | no match       | 0.35                  | 150               |             |            |                      |
| 403  | 227.096 | C12H18O4H+     | 0.35                  | 150               |             |            |                      |
| 404  | 255.137 | C17H18O2H+     | 0.34                  | 150               |             |            |                      |
| 405  | 251.147 | C13H22O6H+     | 0.34                  | 150               |             |            |                      |
| 406  | 42.9691 | no match       | 0.34                  | 150               |             |            |                      |
| 407  | 243.119 | C7H18O7N2H+    | 0.34                  | 150               |             |            |                      |
| 408  | 43.1766 | no match       | 0.34                  | 150               |             |            |                      |
| 409  | 201.176 | no match       | 0.34                  | 150               |             |            |                      |
| 410  | 297.077 | 13CC12H13O7NH+ | 0.34                  | 150               |             |            |                      |
| 411  | 283.24  | C16H30O2N2H+   | 0.34                  | 150               |             |            |                      |
| 412  | 124.041 | C6H5O2NH+      | 0.33                  | 150               |             |            |                      |
| 413  | 240.236 | no match       | 0.33                  | 150               |             |            |                      |
| 414  | 271.14  | C10H22O8H+     | 0.33                  | 150               |             |            |                      |
| 415  | 275.246 | C18H30N2H+     | 0.32                  | 150               |             |            |                      |
| 416  | 237.137 | C16H16N2H+     | 0.32                  | 200               |             |            |                      |
| 417  | 44.0121 | CHONH+         | 0.31                  | 150               |             |            |                      |
| 418  | 40.9457 | no match       | 0.31                  | 150               |             |            |                      |
| 419  | 432.075 | no match       | 0.31                  | 150               |             |            |                      |
| 420  | 194.098 | C14H11NH+      | 0.31                  | 150               |             |            |                      |
| 421  | 448.087 | no match       | 0.3                   | 150               |             |            |                      |
| 422  | 192.104 | 13CC6H14O4N2H+ | 0.3                   | 150               |             |            |                      |
| 423  | 82.8441 | no match       | 0.29                  | 150               |             |            |                      |

| Rank | m/z     | Formula         | Maximum concentration<br>/ng/m3 | Desorption Temp.<br>of max. conc. /°C | Description | Literature | H2O relatives |
|------|---------|-----------------|---------------------------------|---------------------------------------|-------------|------------|---------------|
| 424  | 253.178 | 13CC17H21NH+    | 0.29                            | 150                                   |             |            |               |
| 425  | 219.168 | C10H22O3N2H+    | 0.29                            | 350                                   |             |            |               |
| 426  | 287.148 | C14H22O6H+      | 0.28                            | 200                                   |             |            |               |
| 427  | 373.088 | no match        | 0.27                            | 150                                   |             |            |               |
| 428  | 235.165 | C10H22O4N2H+    | 0.27                            | 150                                   |             |            |               |
| 429  | 191.176 | C9H22O2N2H+     | 0.27                            | 100                                   |             |            |               |
| 430  | 237.212 | no match        | 0.27                            | 150                                   |             |            |               |
| 431  | 41.0866 | no match        | 0.27                            | 150                                   |             |            |               |
| 432  | 594.142 | no match        | 0.26                            | 100                                   |             |            |               |
| 433  | 268.259 | no match        | 0.26                            | 150                                   |             |            |               |
| 434  | 210.193 | 13CC13H24OH+    | 0.25                            | 100                                   |             |            |               |
| 435  | 245.157 | C15H16O3H+      | 0.25                            | 350                                   |             |            |               |
| 436  | 280.16  | 13CC10H22O6N2H+ | 0.25                            | 150                                   |             |            |               |
| 437  | 108.804 | no match        | 0.23                            | 150                                   |             |            |               |
| 438  | 179.175 | no match        | 0.23                            | 350                                   |             |            |               |
| 439  | 221.076 | C7H12O6N2H+     | 0.23                            | 250                                   |             |            |               |
| 440  | 257.099 | C7H16O8N2H+     | 0.22                            | 150                                   |             |            |               |
| 441  | 259.185 | no match        | 0.22                            | 150                                   |             |            |               |
| 442  | 242.12  | 13CC10H16O4N2H+ | 0.22                            | 200                                   |             |            |               |
| 443  | 120.047 | 13CC2H6O3N2H+   | 0.2                             | 150                                   |             |            |               |
| 444  | 303.273 | 13CC16H35O3N3H+ | 0.2                             | 150                                   |             |            |               |
| 445  | 221.148 | C9H20O4N2H+     | 0.19                            | 150                                   |             |            |               |
| 446  | 286.275 | C17H35O2NH+     | 0.17                            | 150                                   |             |            |               |
| 447  | 192.137 | C12H17ONH+      | 0.15                            | 150                                   |             |            |               |
| 448  | 358.06  | no match        | 0.14                            | 150                                   |             |            |               |
| 449  | 120.039 | 13CC3H6O4H+     | 0.13                            | 150                                   |             |            |               |
| 450  | 260.186 | C13H25O4NH+     | 0.11                            | 150                                   |             |            |               |
| 451  | 581.1   | no match        | 0.1                             | 100                                   |             |            |               |

## References

- Bayle, K., Gilbert, A., Julien, M., Yamada, K., Silvestre, V., Robins, R. J., Akoka, S., Yoshida, N., and Remaud, G. S.: Conditions to obtain precise and true measurements of the intramolecular  $^{13}\text{C}$  distribution in organic molecules by isotopic  $^{13}\text{C}$  nuclear magnetic resonance spectrometry, *Anal. Chim. Acta.*, 846, 1–7, doi:10.1016/j.aca.2014.07.018, <http://www.sciencedirect.com/science/article/pii/S0003267014008630>, 2014.
- Camredon, M., Hamilton, J. F., Alam, M. S., Wyche, K. P., Carr, T., White, I. R., Monks, P. S., Rickard, A. R., and Bloss, W. J.: Distribution of gaseous and particulate organic composition during dark alpha-pinene ozonolysis, *Atmos. Chem. Phys.*, 10, 2893–2917, doi:10.5194/acp-10-2893-2010, <http://www.atmos-chem-phys.net/10/2893/2010/>, 2010.
- Cappellin, L., Karl, T., Probst, M., Ismailova, O., Winkler, P. M., Soukoulis, C., Aprea, E., Märk, T. D., Gasperi, F., and Biasioli, F.: On Quantitative Determination of Volatile Organic Compound Concentrations Using Proton Transfer Reaction Time-of-Flight Mass Spectrometry, *Environ. Sci. Technol.*, 46, 2283–2290, doi:10.1021/es203985t, <http://pubs.acs.org/doi/abs/10.1021/es203985t>, 2012.
- Caytan, E., Remaud, G. S., Tenailleau, E., and Akoka, S.: Precise and accurate quantitative  $^{13}\text{C}$  NMR with reduced experimental time, *Talanta*, 71, 1016–1021, doi:10.1016/j.talanta.2006.05.075, 2007b.
- Caytan, E., Botosoa, E. P., Silvestre, V., Robins, R. J., Akoka, S., and Remaud, G. S.: Accurate Quantitative  $^{13}\text{C}$  NMR Spectroscopy: Repeatability over Time of Site-Specific  $^{13}\text{C}$  Isotope Ratio Determination, *Anal. Chem.*, 79, 8266–8269, doi:10.1021/ac070826k, 2007.
- Hartz, K. E. H., Rosenørn, T., Ferchak, S. R., Raymond, T. M., Bilde, M., Donahue, N. M., and Pandis, S. N.: Cloud condensation nuclei activation of monoterpene and sesquiterpene secondary organic aerosol, *J. Geophys. Res.*, 110, D14 208, doi:10.1029/2004JD005754, <http://www.agu.org/pubs/crossref/2005/2004JD005754.shtml>, 2005.
- Holzinger, R., Kasper-Giebl, A., Staudinger, M., Schauer, G., and Röckmann, T.: Analysis of the chemical composition of organic aerosol at the Mt. Sonnblick observatory using a novel high mass resolution thermal-desorption proton-transfer-reaction mass-spectrometer (hr-TD-PTR-MS), *Atmos. Chem. Phys.*, 10, 10 111–10 128, doi:10.5194/acp-10-10111-2010, <http://www.atmos-chem-phys.net/10/10111/2010/>, 2010a, 2010-1, 2010.
- Jenkin, M. E.: Modelling the formation and composition of secondary organic aerosol from alpha- and beta-pinene ozonolysis using MCM v3, *Atmos. Chem. Phys.*, 4, 1741–1757, doi:10.5194/acp-4-1741-2004, <http://www.atmos-chem-phys.net/4/1741/2004/>, 2004.
- King, S. M., Butcher, A. C., Rosenørn, T., Coz, E., Lieke, K. I., de Leeuw, G., Nilsson, E. D., and Bilde, M.: Investigating Primary Marine Aerosol Properties: CCN Activity of Sea Salt and Mixed Inorganic–Organic Particles, *Environ. Sci. Technol.*, 46, 10 405–10 412, doi:10.1021/es300574u, <http://pubs.acs.org/doi/abs/10.1021/es300574u>, 2012.
- Lee, A., Goldstein, A. H., Keywood, M. D., Gao, S., Varutbangkul, V., Bahreini, R., Ng, N. L., Flagan, R. C., and Seinfeld, J. H.: Gas-phase products and secondary aerosol yields from the ozonolysis of ten different terpenes, *J. Geophys. Res.*, 111, D07 302, doi:10.1029/2005JD006437, <http://www.agu.org/pubs/crossref/2006/2005JD006437.shtml>, 2006.
- Martin, G. J., Martin, M. L., and Remaud, G.: SNIF-NMR—Part 3: From Mechanistic Affiliation to Origin Inference, in: *Modern Magnetic Resonance*, edited by Webb, G. A., pp. 1669–1680, Springer Netherlands, doi:10.1007/1-4020-3910-7\_187, 2006a.
- Martin, M., Zhang, B., and Martin, G. J.: SNIF-NMR—Part 2: Isotope Ratios as Tracers of Chemical and Biochemical Mechanistic Pathways, in: *Modern Magnetic Resonance*, edited by Webb, G. A., pp. 1659–1667, Springer Netherlands, doi:10.1007/1-4020-3910-7\_186, 2006b.
- Shilling, J. E., Chen, Q., King, S. M., Rosenørn, T., Kroll, J. H., Worsnop, D. R., McKinney, K. A., and Martin, S. T.: Particle mass yield in secondary organic aerosol formed by the dark ozonolysis of alpha-pinene, *Atmos. Chem. Phys.*, 8, 2073–2088, doi:10.5194/acp-8-2073-2008, [www.atmos-chem-phys.net/8/2073/2008/](http://www.atmos-chem-phys.net/8/2073/2008/), 2008.

- Silvestre, V., Mboula, V. M., Jouitteau, C., Akoka, S., Robins, R. J., and Remaud, G. S.: Isotopic  $^{13}\text{C}$  NMR spectrometry to assess counterfeiting of active pharmaceutical ingredients: Site-specific  $^{13}\text{C}$  content of aspirin and paracetamol, *J. Pharmaceut. Biomed.*, 50, 336–341, doi:10.1016/j.jpba.2009.04.030, <http://www.sciencedirect.com/science/article/pii/S0731708509002738>, 2009.
- 5 Tani, A., Hayward, S., and Hewitt, C.: Measurement of monoterpenes and related compounds by proton transfer reaction-mass spectrometry (PTR-MS), *Int. J. Mass Spectrom.*, 223–224, 561–578, doi:10.1016/S1387-3806(02)00880-1, <http://www.sciencedirect.com/science/article/pii/S1387380602008801>, 2003.
- Tenailleau, E. and Akoka, S.: Adiabatic  $^1\text{H}$  decoupling scheme for very accurate intensity measurements in  $^{13}\text{C}$  NMR, *J. Magn. Reson.*, 185, 50–58, doi:10.1016/j.jmr.2006.11.007, <http://linkinghub.elsevier.com/retrieve/pii/S1090780706003818>, 2007.
- 10 VanReken, T. M., Ng, N. L., Flagan, R. C., and Seinfeld, J. H.: Cloud condensation nucleus activation properties of biogenic secondary organic aerosol, *J. Geophys. Res.*, 110, D07 206, doi:10.1029/2004JD005465, <http://www.agu.org/pubs/crossref/2005/2004JD005465.shtml>, 2005.
- Zelenyuk, A., Yang, J., Song, C., Zaveri, R. A., and Imre, D.: A New Real-Time Method for Determining Particles' Sphericity and Density: Application to Secondary Organic Aerosol Formed by Ozonolysis of alpha-Pinene, *Environ. Sci. Technol.*, 42, 8033–8038, doi:10.1021/es8013562, <http://pubs.acs.org/doi/pdf/10.1021/es8013562>, 2008.
