# Supplementary material for: Chemical and isotopic composition of secondary organic aerosol generated by α -pinene ozonolysis
Source: Copernicus journal article supplement (doi:10.5194/acp-2016-98), 2016-02-19
Supplement: Supplementary file [file acp-2016-98-AC1-supplement.pdf]

Reply to S. Irei (doi:10.5194/acp-2016-98)

Dear S. Irei,

Thank you very much for participating in the online discussion of our paper. Your comment is absolutely correct - we did cite the wrong paper of yours and we wish to apologize for the mistake. We meant to refer to your 2014 ES&T paper, but instead quoted the 2015 reference. Also, in order to make sure the content of your 2014 paper is cited correctly, we altered the statement to:

“Irei et al. (2014) found that SOA formation from oxidation of volatile organics lead to depletion in  $^{13}\text{C}$  in the low-volatile fraction of the aerosol. ”

We did not mean PM-internal reactions and hope that the new formulation helps to avoid implying that.

These changes were included in the revised version that addresses also other issues raised by the reviewers. We will make sure that the final document cites your work appropriately.

Thank you for your help in making our paper better.

On behalf of the authors,  
Carl Meusinger
